# Supplementary material for: Novel bonding patterns and optoelectronic properties of the two-dimensional SixCymonolayers
Source: Royal Society of Chemistry journal article supplement (doi:10.1039/c6tc05415c), 2017-01-01
Supplement: c6tc05415c1.pdf [file c6tc05415c1.pdf]

# Supporting Information

## **Novel bonding patterns and optoelectronic properties of the two-dimensional Si<sub>x</sub>C<sub>y</sub> monolayers**

Dong Fan,<sup>a</sup> Shaohua Lu,<sup>a\*</sup> Yundong Guo<sup>b</sup> and Xiaojun Hu<sup>a\*</sup>

*a. College of Materials Science and Engineering, Zhejiang University of Technology, Hangzhou 310014, China*

*b. School of Engineering and Technology, Neijiang Normal University, Neijiang, 641000, China.*

\*E-mail: lsh@zjut.edu.cn; huxj@zjut.edu.cn

**Table S1** | Calculated lattice constants, bond lengths, and cohesive energy of the predicted low-energy 2D SiC monolayers at GGA (PBE) level.

|                                         | Lattice constant<br>Å           | Bond lengths<br>Å                           | Property | Cohesive energy<br>eV/atom |
|-----------------------------------------|---------------------------------|---------------------------------------------|----------|----------------------------|
| <b>Graphene</b>                         | a=b=2.46                        | C-C 1.42                                    | DF       | 7.94                       |
| <b>L-SiC<sub>4</sub></b>                | a= 6.25 b=2.45<br>buckling 0.95 | Si-Si 2.45 Si-C 1.89 C-C 1.42               | DF       | 6.91                       |
| <b><math>\delta</math>-silagraphyne</b> | a=6.26 b=4.10                   | Si-C 1.77 & 1.85 C-C 1.34 & 1.26            | SM       | 6.55                       |
| <b>g-SiC<sub>2</sub></b>                | a=b=5.02                        | Si-C 1.80 C-C 1.45                          | DB       | 6.46 <sup>a</sup>          |
| <b>L-SiC<sub>2</sub></b>                | a= 2.48 b=8.58<br>buckling 0.63 | Si-Si 2.48 Si-C 1.97 C-C 1.42               | IDB      | 6.20                       |
| <b><math>\alpha</math>-silagraphyne</b> | a=b=8.25                        | Si-C 1.76 C-C 1.24                          | DF       | 6.09                       |
| <b>pt-SiC</b>                           | a=2.86, b=3.88                  | Si-C 1.92 C-C 1.33                          | M        | 6.04 <sup>b</sup>          |
| <b><math>\beta</math>-silagraphyne</b>  | a=b=11.78                       | Si-Si 2.20 Si-C 1.78 C-C 1.24               | DF       | 5.84                       |
| <b>O-Si<sub>2</sub>C<sub>3</sub></b>    | a=6.79 b=3.06                   | Si-C 1.75 C-C 1.33                          | SM       | 5.81                       |
| <b>t-SiC</b>                            | a=3.67 b=3.21<br>buckling 1.42  | Si-C 1.92 & 1.87                            | DB       | 5.55                       |
| <b><math>\gamma</math>-silagraphyne</b> | a=b=9.27<br>buckling 0.48       | Si-Si 2.23 Si-C 1.79 C-C 1.23               | DS       | 5.36                       |
| <b>L-silagraphyne</b>                   | a=5.03 b=7.24<br>buckling 0.65  | Si-Si 2.28 Si-C 1.86 & 1.73 C-C 1.35 & 1.25 | SM       | 5.35                       |
| <b>t-Si<sub>2</sub>C</b>                | a=2.79 b=9.09                   | Si-Si 2.44 Si-C 1.89                        | SM       | 4.85                       |
| <b>T-silagraphyne</b>                   | a=3.17<br>b=10.58               | Si-C 1.82 C-C 1.40 & 1.24                   | IDB      | 4.50                       |
| <b>Silicene</b>                         | a=b=3.87                        | Si-Si 2.28                                  | DF       | 3.93                       |

\* DF: Dirac Fermions. DB: Direct band gap. IDB: Indirect band gap.

\* SM: Semi-metallic. M: metallic

\* a: Ref.[17] b:Ref.[16]

**Table S2** | Calculated elastic constants, in-plane stiffness and Poisson's coefficients for predicted low-energy 2D SiC monolayers.\*<sup>1</sup>

|                                  | C <sub>11</sub> /<br>GPa | C <sub>22</sub> /<br>GPa | C <sub>12</sub> /<br>GPa | C <sub>66</sub> /<br>GPa | In-plane stiffness/<br>GPa·nm             | Poisson's<br>ratio |
|----------------------------------|--------------------------|--------------------------|--------------------------|--------------------------|-------------------------------------------|--------------------|
| Graphene                         | 358                      | 358                      | 65                       | 147                      | 346.73                                    | 0.18               |
| Silicene                         | 69                       | 69                       | 22                       | 23                       | 61.88                                     | 0.32               |
| <i>t</i> -SiC                    | 152                      | 123                      | 22                       | 95                       | 105(a)* <sup>2</sup> 119(b)* <sup>2</sup> | 0.18(a)0.14(b)     |
| <i>t</i> -Si <sub>2</sub> C      | 153                      | 173                      | 24                       | 60                       | 150(a)169(b)                              | 0.14(a)0.16(b)     |
| L-SiC <sub>4</sub>               | 121                      | 292                      | 12                       | 67                       | 121(a)291(b)                              | 0.04(a)0.10(b)     |
| L-SiC <sub>2</sub>               | 254                      | 139                      | 7                        | 49                       | 253(a)139(b)                              | 0.05(a)0.03(b)     |
| O-Si <sub>2</sub> C <sub>3</sub> | 219                      | 125                      | 46                       | 26                       | 202(a)115(b)                              | 0.37(a)0.21(b)     |

\*<sup>1</sup>: Calculated by equations in Reference: Zhang, S., et al. PNAS, 112.8(2015):2372-7. where C<sub>11</sub>, C<sub>12</sub>, C<sub>21</sub> and C<sub>22</sub> represent elastic contacts (GPa) calculated by VASP.

\*<sup>2</sup>: a direction and b direction of 2D BC compounds.

**Table S3** | Calculated elastic constants, in-plane stiffness and Poisson's coefficients for predicted low-energy 2D SiC monolayers.

|                       | C <sub>11</sub> /<br>GPa | C <sub>22</sub> /<br>GPa | C <sub>12</sub> /<br>GPa | C <sub>66</sub> /<br>GPa | In-plane stiffness/<br>GPa·nm  | Poisson's ratio              |
|-----------------------|--------------------------|--------------------------|--------------------------|--------------------------|--------------------------------|------------------------------|
| <b>α-graphyne</b>     | 96                       | 96                       | 81                       | 7                        | 27.03(21.00 <sup>ref1</sup> )  | 0.85(0.88 <sup>ref1</sup> )  |
| <b>β-graphyne</b>     | 130                      | 130                      | 88                       | 21                       | 70.80(73.07 <sup>ref2</sup> )  | 0.68(0.67 <sup>ref2</sup> )  |
| <b>γ-graphyne</b>     | 196                      | 196                      | 83                       | 56                       | 160.25(162.1 <sup>ref3</sup> ) | 0.43(0.429 <sup>ref3</sup> ) |
| <b>α-silagraphyne</b> | 61                       | 61                       | 55                       | 3                        | 17.00                          | 0.89                         |
| <b>β-silagraphyne</b> | 68                       | 68                       | 53                       | 8                        | 26.36                          | 0.78                         |
| <b>γ-silagraphyne</b> | 76                       | 76                       | 47                       | 15                       | 47.55                          | 0.61                         |
| <b>δ-silagraphyne</b> | 253                      | 105                      | 32                       | 7                        | 243(a)101(b)                   | 0.30(a)0.13(b)               |
| <b>T-silagraphyne</b> | 95                       | 242                      | 35                       | 9                        | 90(a)229(b)                    | 0.14(a)0.37(b)               |
| <b>L-silagraphyne</b> | 39                       | 87                       | 9                        | 1                        | 38(a)84(b)                     | 0.10(a)0.23(b)               |

**Ref<sup>1</sup>**: Journal of Physical Chemistry C 117.5 (2013): 2175-2182.

**Ref<sup>2</sup>**:Carbon 96 (2016): 879-887.

**Ref<sup>3</sup>**: Physical Chemistry Chemical Physics 14.38 (2012): 13385-13391.

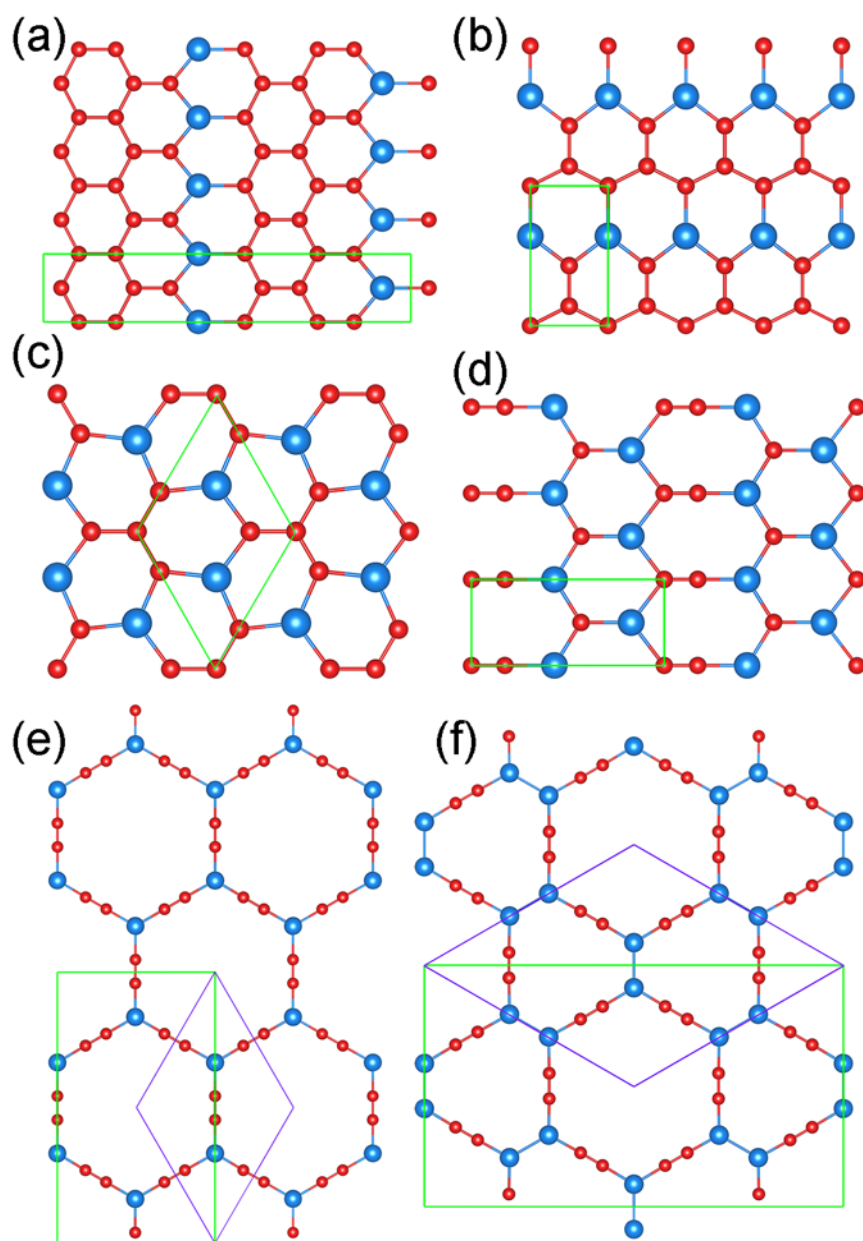

**Fig S1** | Crystal structure of  $h$ -SiC<sub>5</sub>,  $h$ -SiC<sub>3</sub>,  $h$ -SiC<sub>2</sub>, O-Si<sub>2</sub>C<sub>3</sub>,  $\alpha$ -silagraphyne and  $\beta$ -silagraphyne from top view. The blue and red balls represent Si and C atoms, respectively. The green lines denote a unit cell.

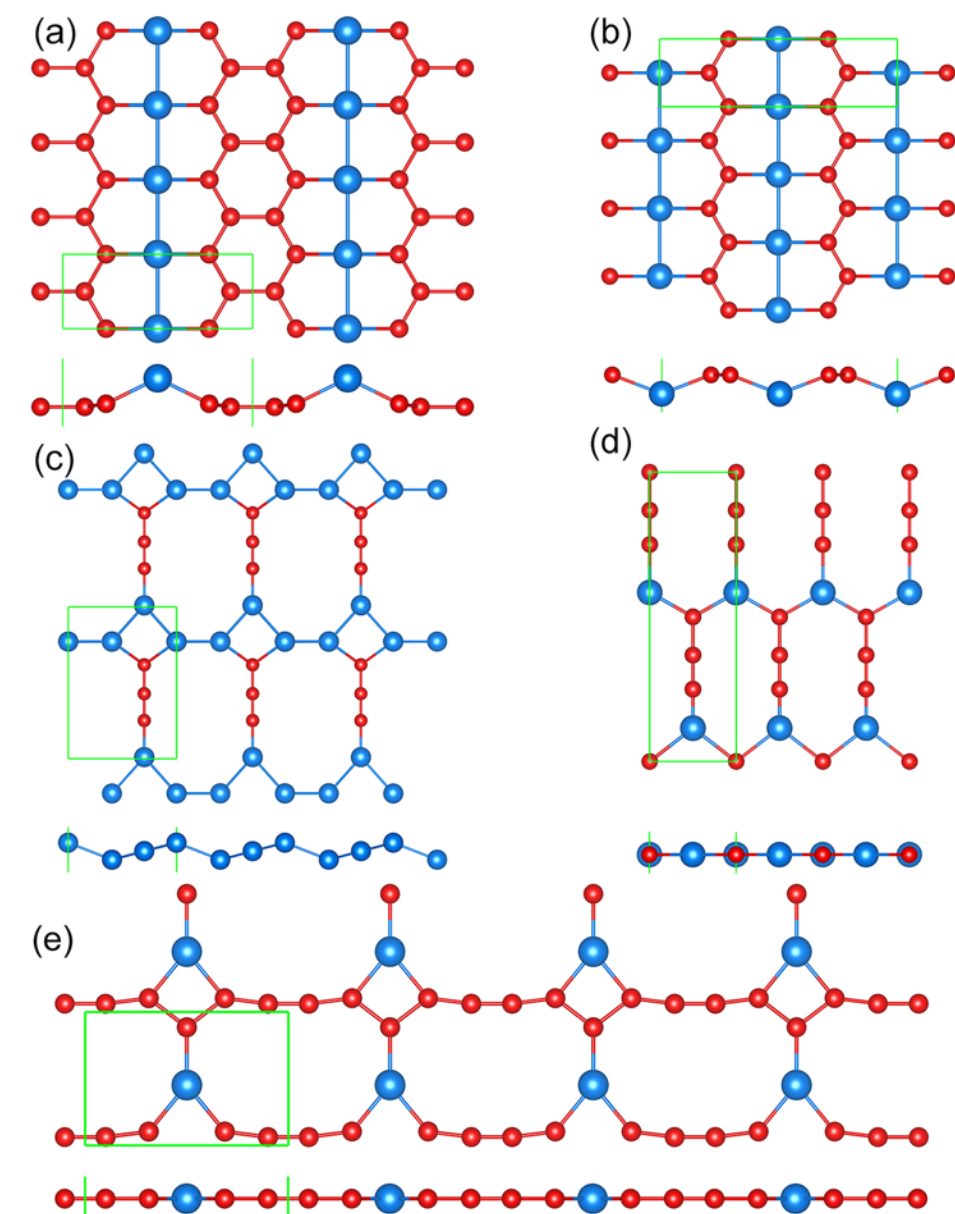

**Fig S2** | Top (upper) and side (lower) views of geometric structure of (a) L-SiC<sub>4</sub>, (b) L-SiC<sub>2</sub>, (c) L-silagraphyne, (d) T-silagraphyne and (e)  $\delta$ -silagraphyne. The green lines denote a unit cell. The blue and red balls represent Si and C atoms, respectively.

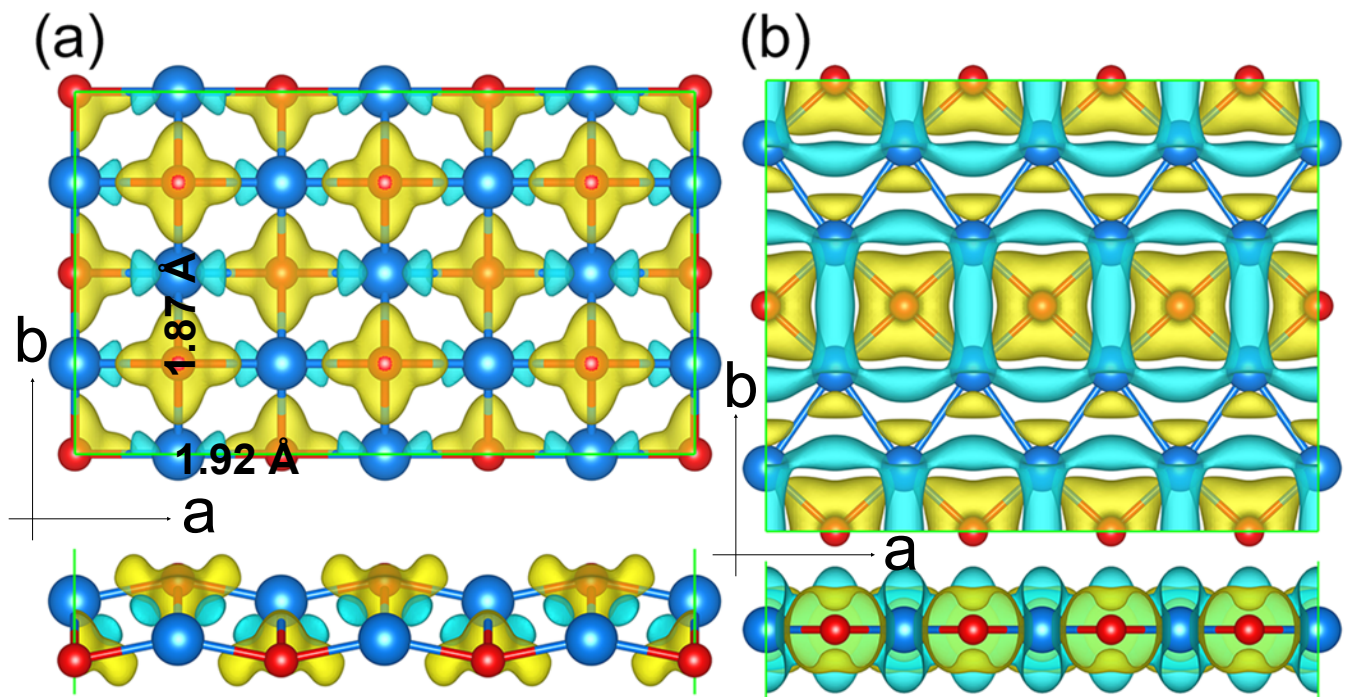

**Fig S3** | Deformation charge density of (a) *t*-SiC and (b) *t*-Si<sub>2</sub>C monolayer. Yellow and blue refer to electron accumulation and depletion regions, respectively. The blue and red balls represent Si and C atoms, respectively. The isosurface value is 0.02 and 0.005 e/au. The transferred electrons mainly originated from the Si atoms of *t*-SiC. The Si-C bond length in the buckled structure is 1.92 and 1.87 Å along **a** and **b** direction, due to the different degree of the localization of electronic states on Si-C bonds.



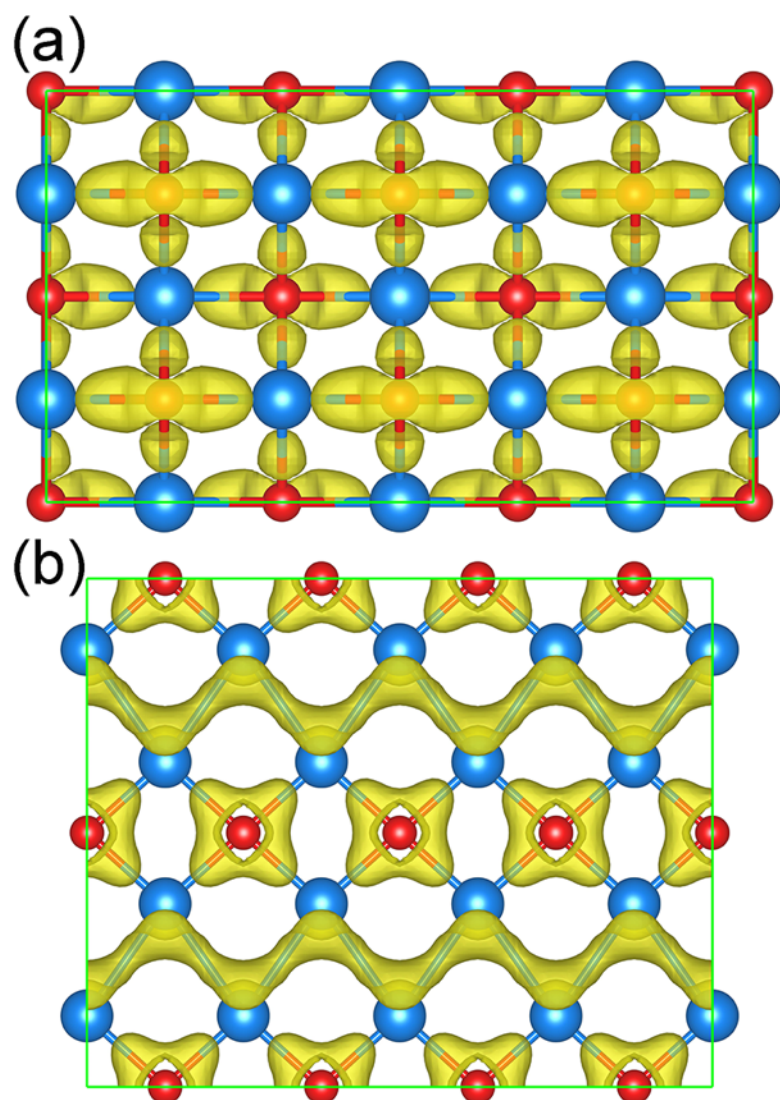

**Fig S4** | Isosurfaces of electron location function plotted with the value of 0.80 and 0.75 au for *t*-SiC and *t*-Si<sub>2</sub>C monolayer, respectively.



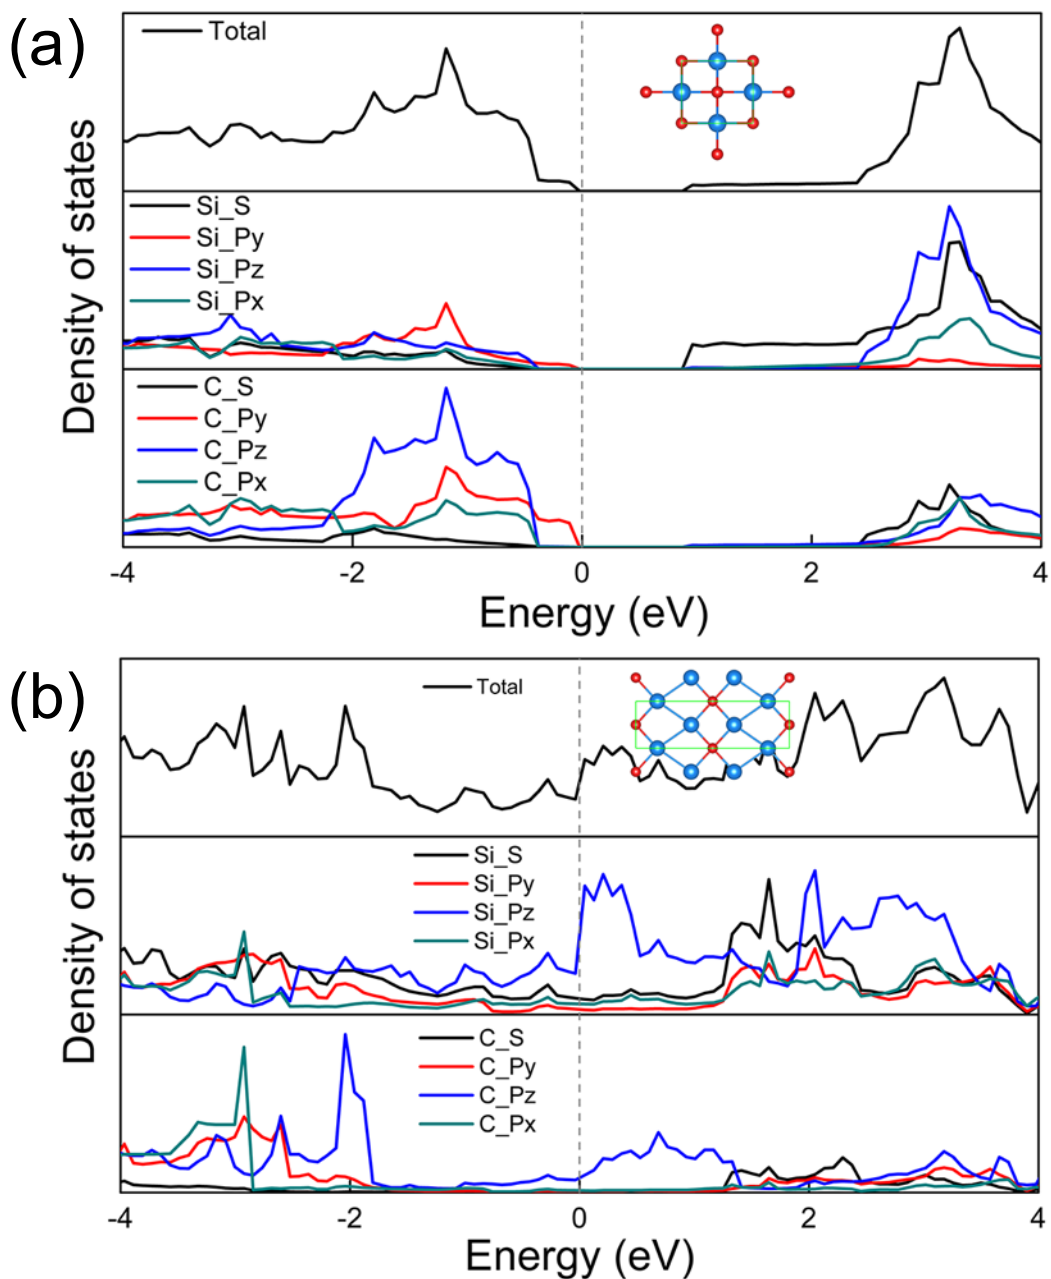

**Fig S5** | Computed Partial density of states for (a) *t*-SiC and (b) *t*-Si<sub>2</sub>C sheets. Calculated at the PBE level of theory and the vertical dashed lines denote the Fermi level.

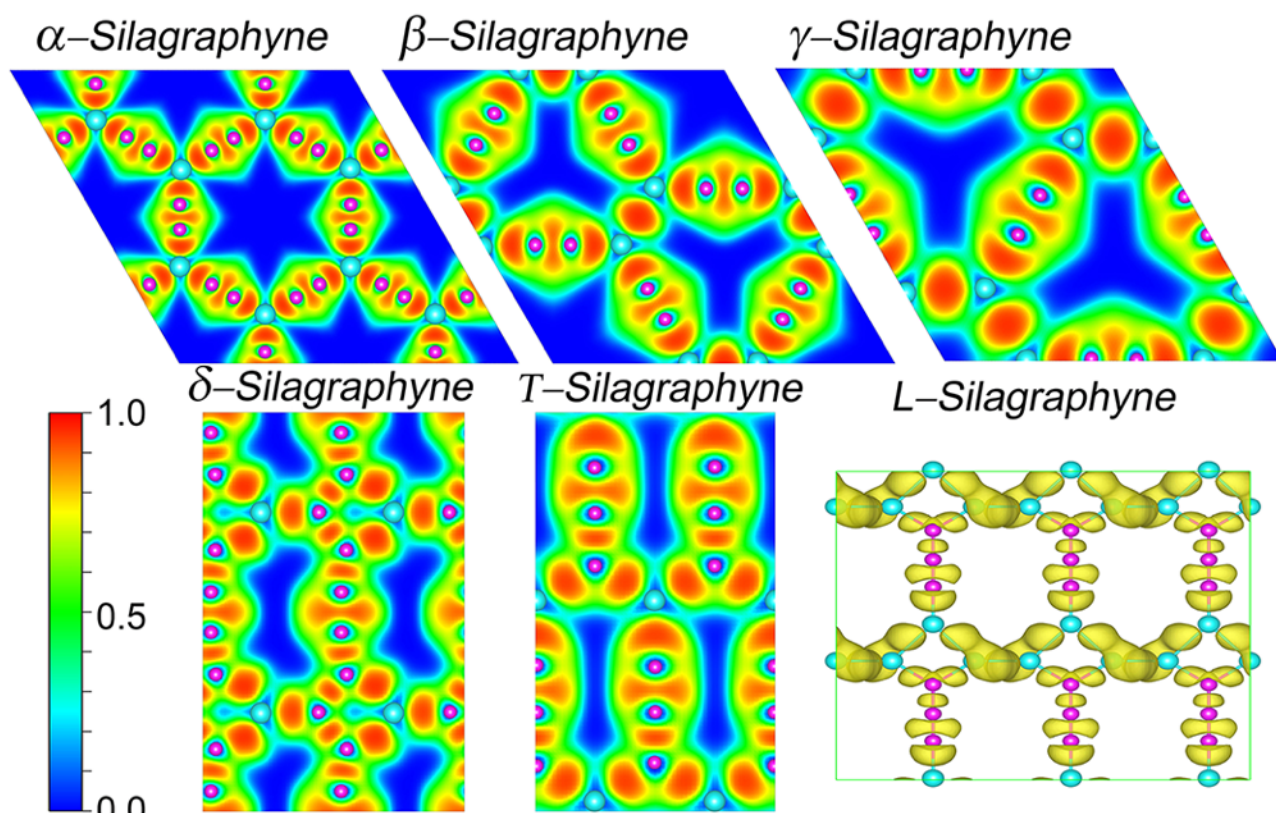

**Fig S6** | Calculated ELF of different silagraphyne. The cyan and pink balls represent Si and C atoms, respectively. For L-silagraphyne, the isosurface value is set as 0.75.

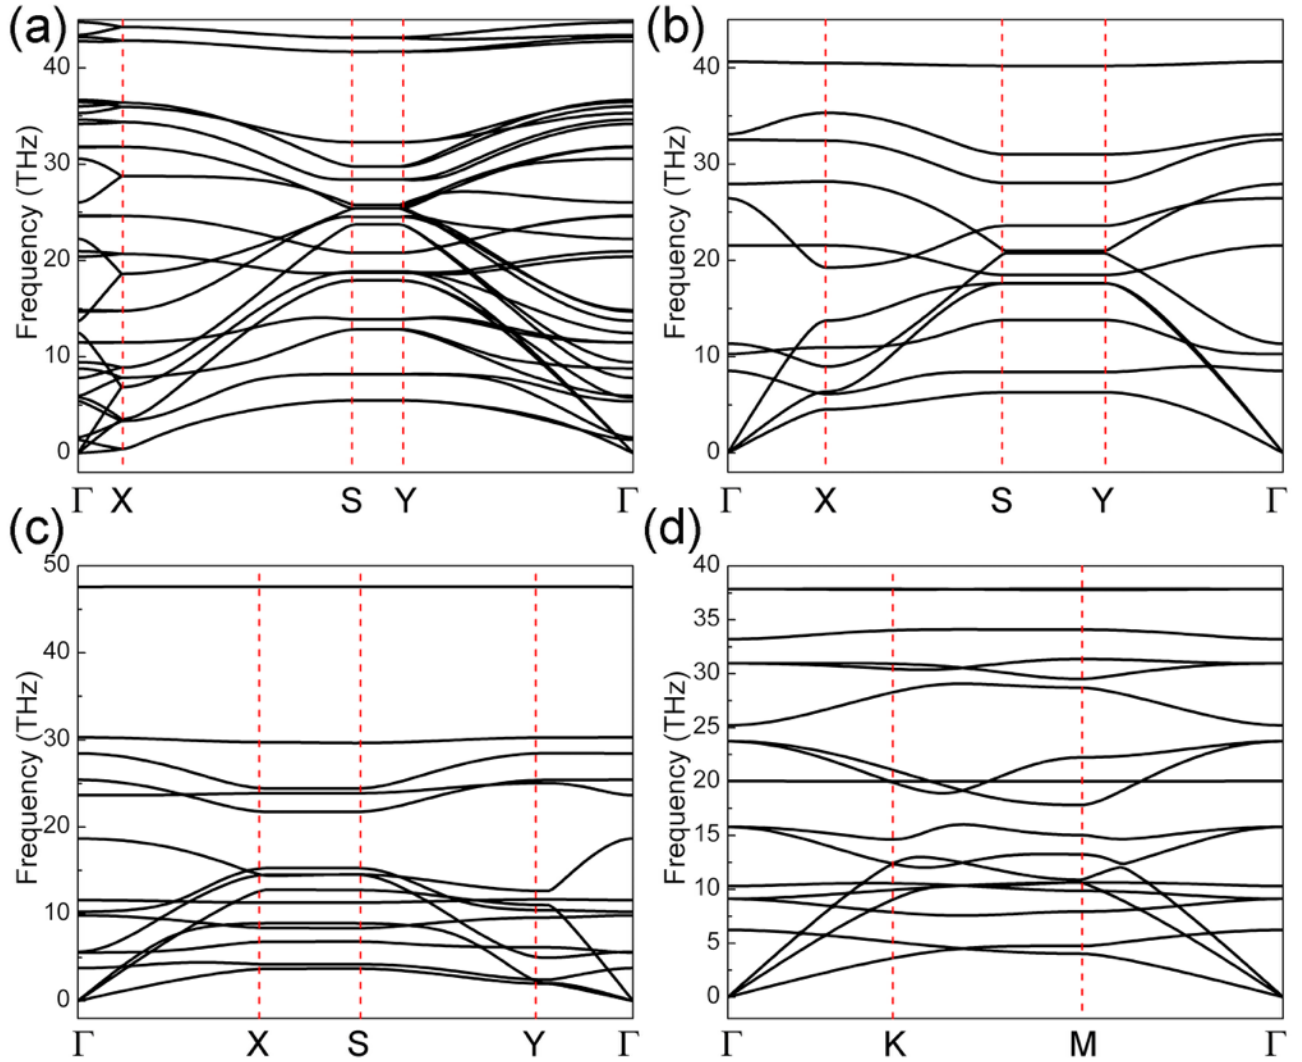

**Fig S7** | Phonon band structures of (a)  $h$ -SiC<sub>5</sub> (b)  $h$ -SiC<sub>3</sub> (c)  $h$ -SiC<sub>2</sub> and (d) O-Si<sub>2</sub>C<sub>3</sub> silagraphene calculated by linear response theory.  $\Gamma$  (0, 0, 0), X (1/2, 0, 0), S (1/2, 1/2, 0), Y (0, 1/2, 0) and K(-1/3, 2/3, 0) represent the symmetry points in the first Brillouin zone in reciprocal space.

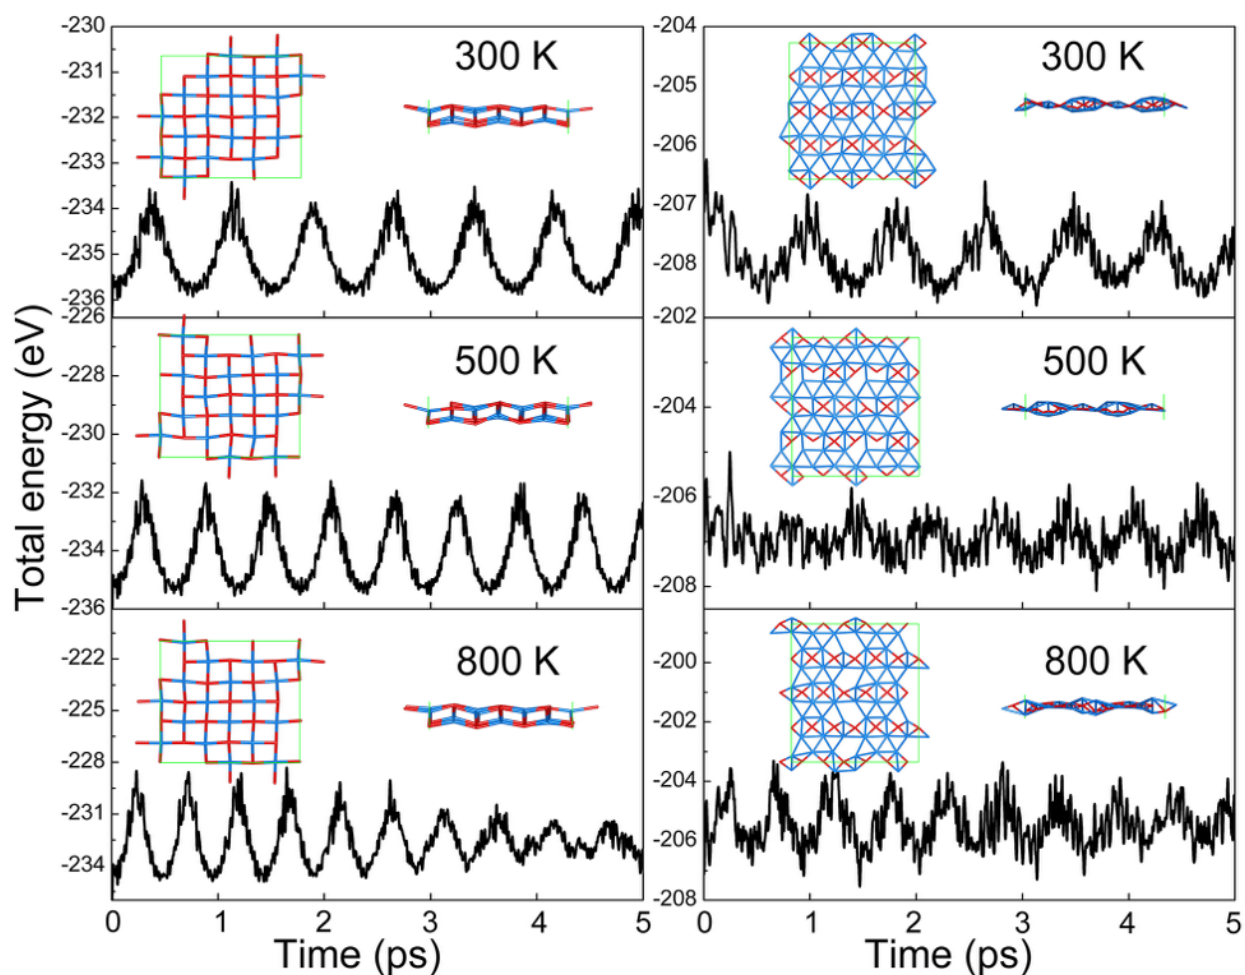

**Fig S8** | Energy fluctuation of  $t$ -SiC (left) and  $t$ -Si<sub>2</sub>C (right) with respect to time in AIMD simulations at different temperature. Inset drawing shows the the final geometrical structure of each AIMD simulation (top and side views).



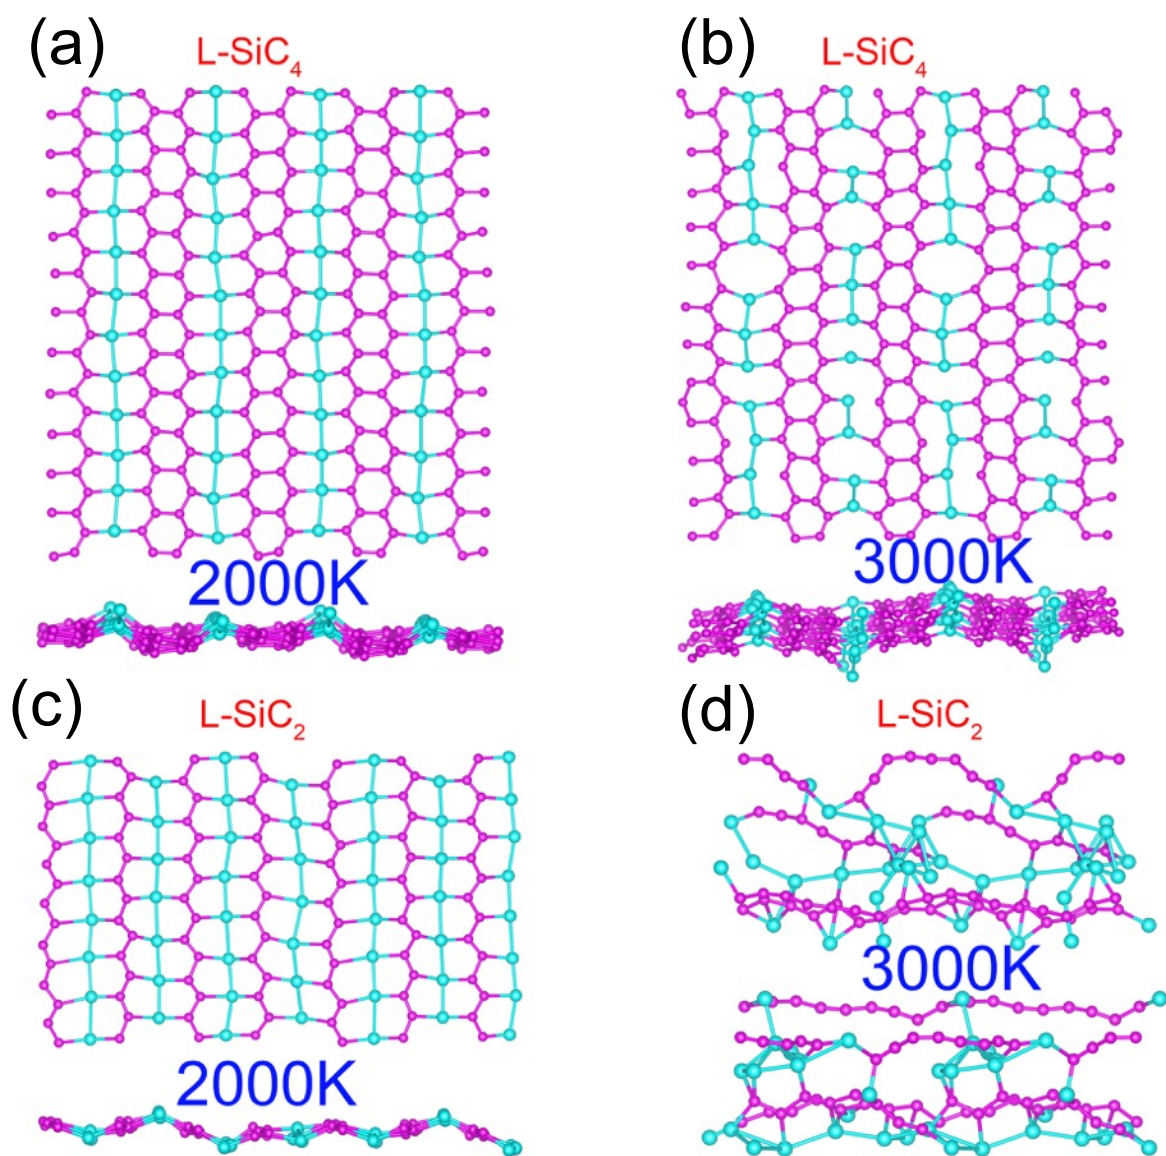

**Fig S9** | Snapshots of the final frame of each AIMD simulation from 2000 to 3000 K (top and side views).

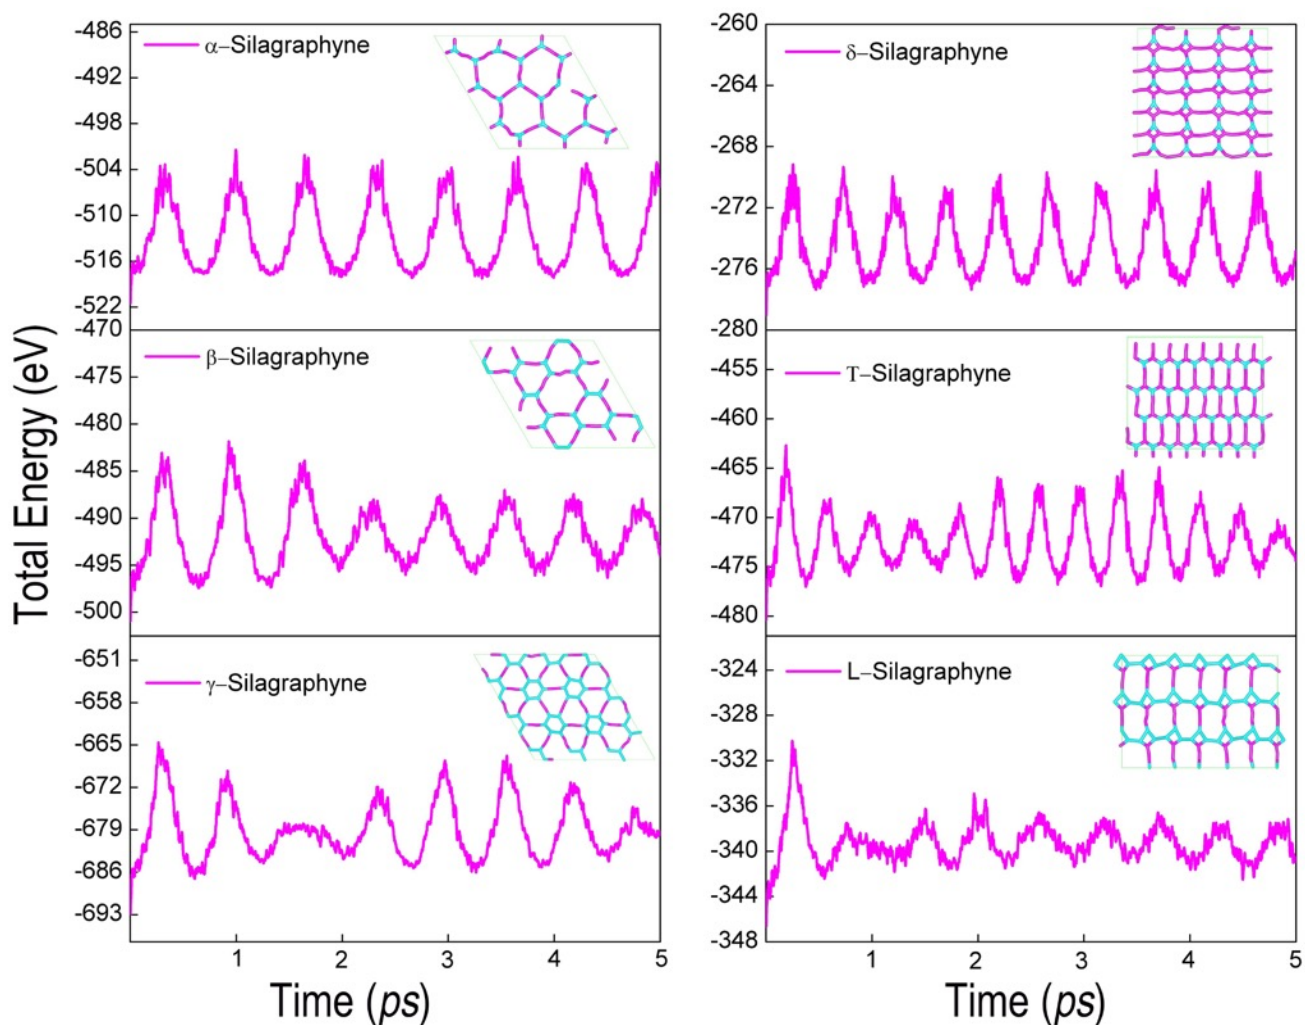

**Fig S10** | Energy fluctuation of proposed Silagraphyne sheets with respect to time in AIMD simulations at 1000K. Inset drawing shows the the final geometrical structure of each AIMD simulation at 1000K.

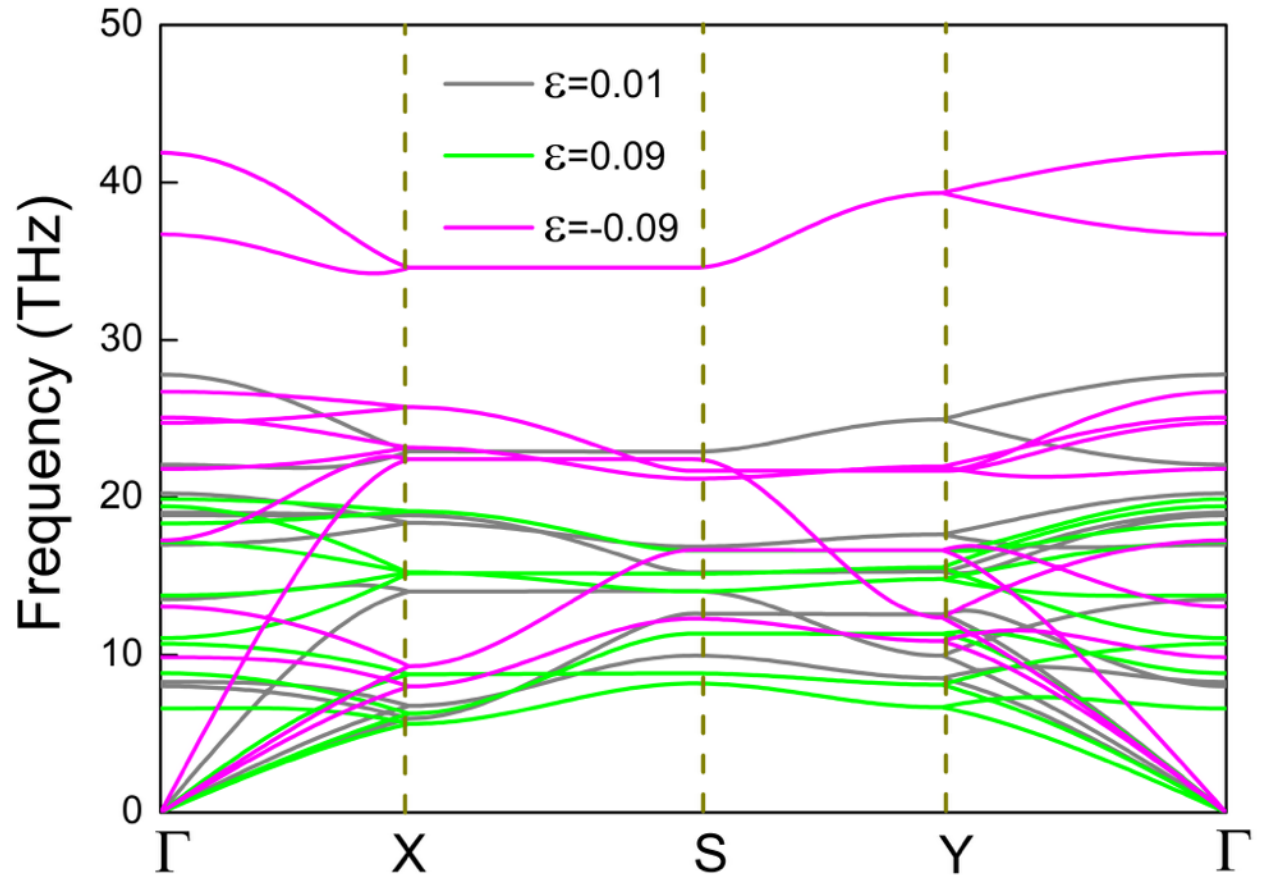

**Fig S11** | Phonon dispersion curve for biaxial strained *t*-SiC sheet calculated by linear response theory.  $\Gamma$  (0, 0, 0), X (1/2, 0, 0), S (1/2, 1/2, 0) and Y (0, 1/2, 0) represent the symmetry points in the first Brillouin zone in reciprocal space.



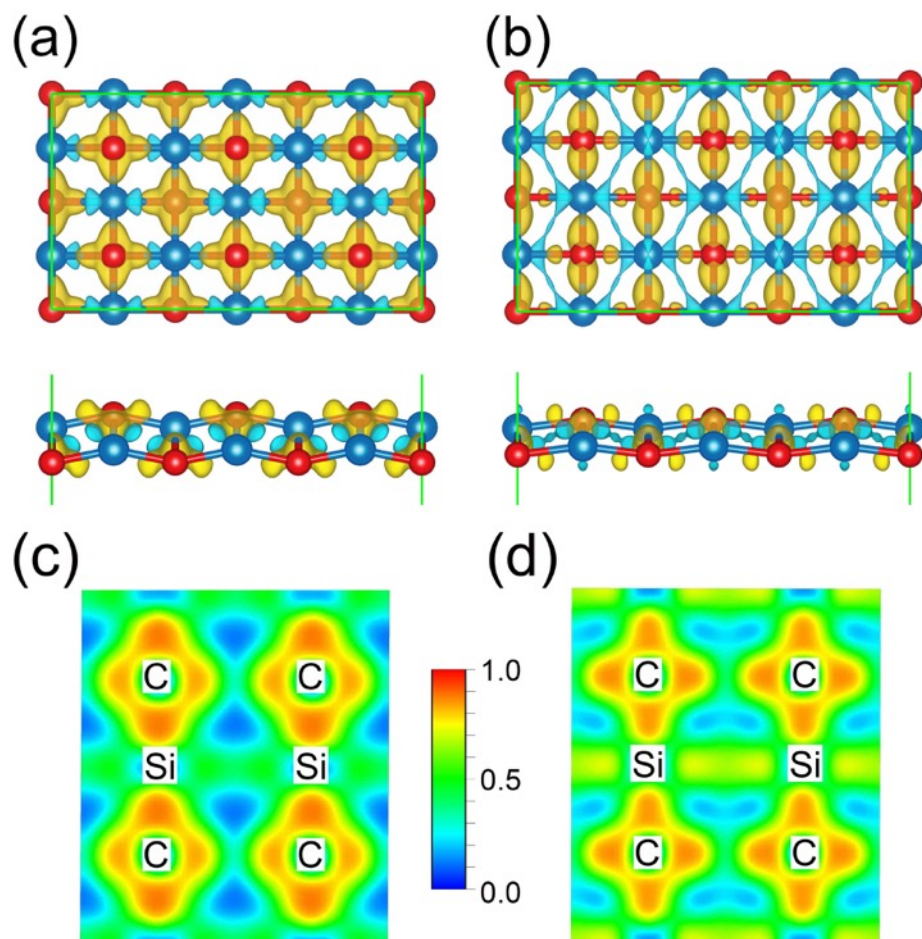

**Fig S12** | Deformation charge density of (a) 0% strained *t*-SiC and (b) 10% strained *t*-SiC monolayer. Yellow and blue refer to electron accumulation and depletion regions, respectively. The blue and red balls represent Si and C atoms, respectively. The isosurface value is 0.02 and 0.015 e/au. (c, d) Corresponding ELF maps. The cyan and pink balls represent Si and C atoms, respectively. The isosurface value is set as 0.75.

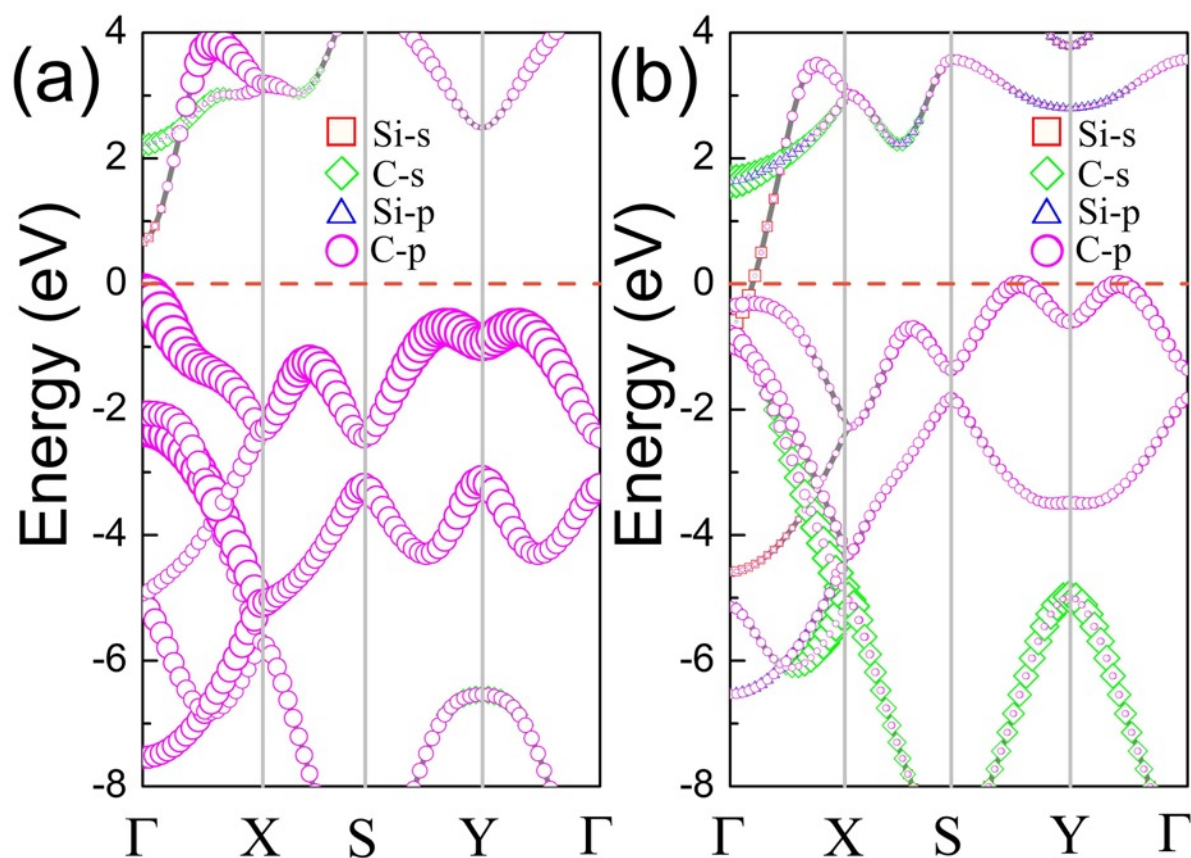

**Fig S13** | The calculated the orbital-resolved band structures of (a) no-strained *t*-SiC and (b) 10% strained *t*-SiC at PBE level of theory. The dots are the contributions from the corresponding atomic orbital of Si or C atoms. Larger dot means higher contribution while smaller one indicates lower contribution.

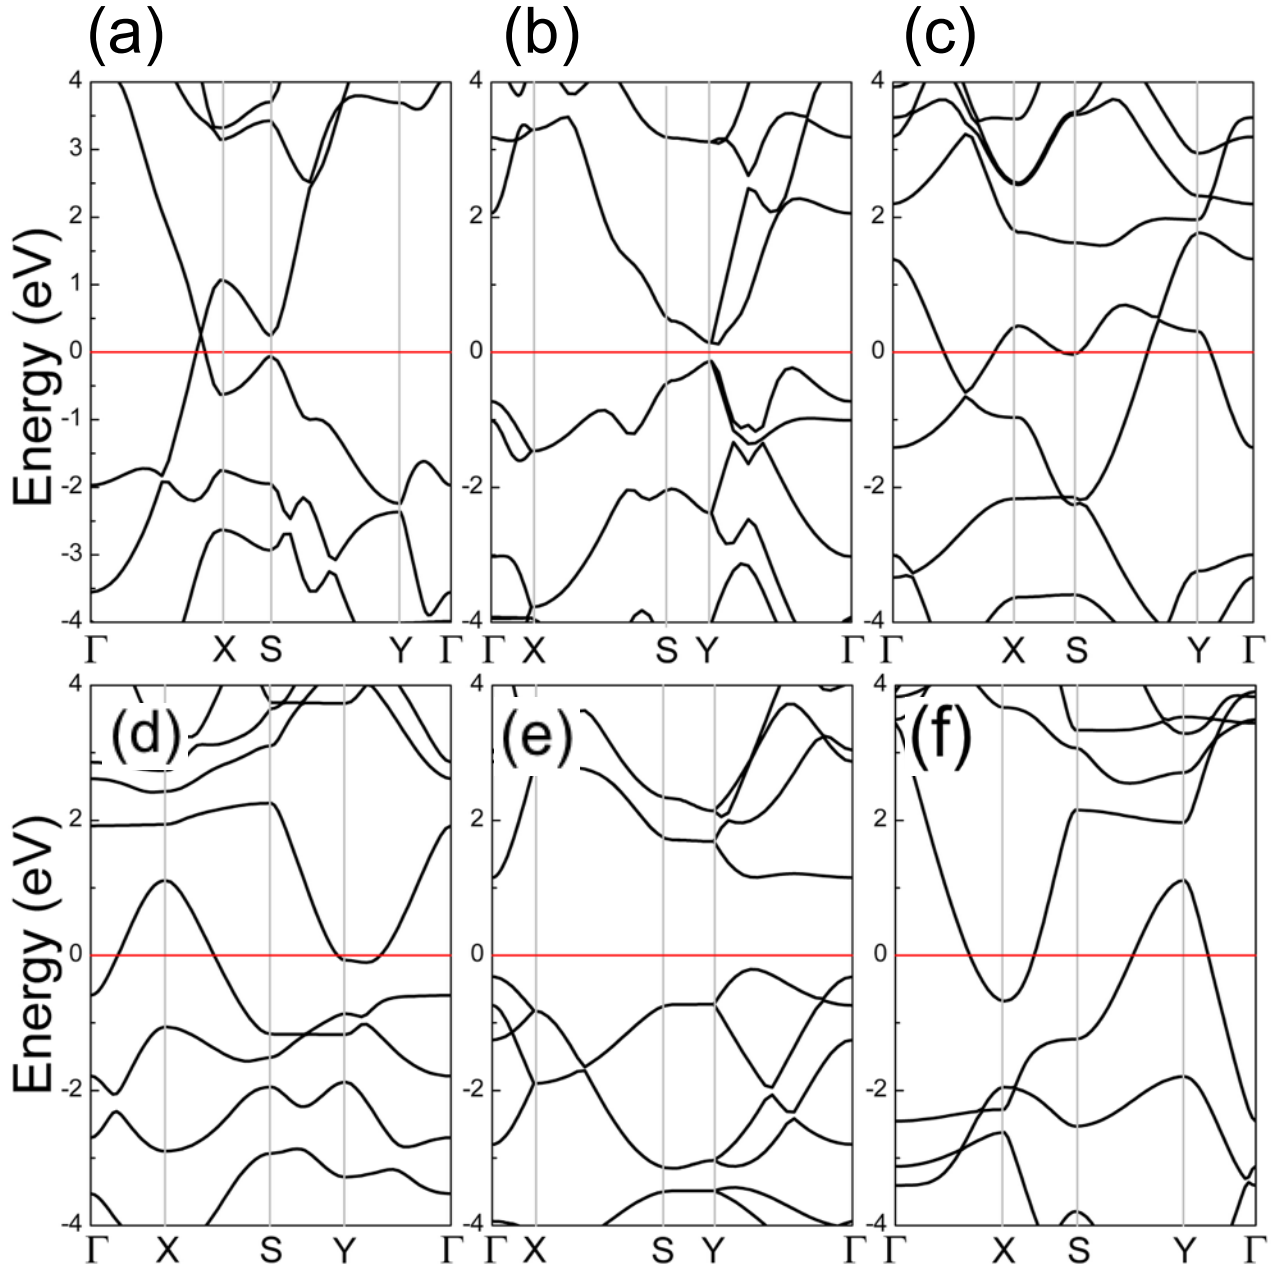

**Fig S14** | The calculated band structure of (a) L-SiC, (b) L-SiC<sub>2</sub>, (c) O-Si<sub>2</sub>C<sub>3</sub>, (d) T-silagraphyne, (e) L-silagraphyne and (f)  $\delta$ -silagraphyne at GGA/PBE level. The Fermi level is set to zero and marked by red lines. The accurate band gap determination provided by the HSE06 method.
